# Supplementary material
Source: publisher figshare collection journal article supplement (https://frontiersin.figshare.com/ndownloader/files/22827956)
Supplement: Supplementary file 1 [file 22827956]

## Sheet: Sheet1
Denitrification potential (mg/m2/h) of coastal wetlands within the Tully-Murray River catchments
Adame et al. Frontiers in Marine Science
	NO3-N at site	Dtot
	(mg/L)	(mg/m2/h)
Melaleuca	0.009	4.01228
Melaleuca	0.001	4.84064
Melaleuca	0.008	5.78443
Mangroves	0.012	3.83288
Saltmarsh	0.038	7.62747
Melaleuca	0.008	3.82211
Melaleuca	0.03	9.7
Freshwater marsh	0.022	9.4
Freshwater marsh	0.022	6.8
Temporal wetland	0.008	9.47
Lagoon with grass	0.005	8.5153
Lagoon with grass	0.148	51.4903
Lagoon with Nymphae spp.	0.007	1.70715
Lagoon with Nymphae spp.	0.123	23.4893
Lagoon	0.048	6.37
Lagoon	0.134	10.8083
